# Supplementary material for: Ce3+-ion, Surface Oxygen Vacancy, and Visible Light-induced Photocatalytic Dye Degradation and Photocapacitive Performance of CeO2-Graphene Nanostructures
Source: PubMed Central journal article supplement (PMC5517655; doi:10.1038/s41598-017-06139-6), 2017-07-19
Supplement: 41598_2017_6139_MOESM1_ESM.pdf [file 41598_2017_6139_MOESM1_ESM.pdf]

**Electronic supplementary information**

**Ce<sup>3+</sup>-ion, Surface Oxygen Vacancy, and Visible Light-induced  
Photocatalytic Dye Degradation and Photocapacitive Performance of CeO<sub>2</sub>-  
Graphene Nanostructures**

Mohammad Ehtisham Khan<sup>1</sup>, Mohammad Mansoob Khan<sup>2\*\*</sup>, and Moo Hwan Cho<sup>1\*</sup>

<sup>1</sup>*School of Chemical Engineering, Yeungnam University, Gyeongsan-si, Gyeongbuk 38541, South Korea. Phone: +82-53-810-2517, Fax: +82-53- 810-4631.*

<sup>2</sup>*Chemical Sciences, Faculty of Science, Universiti Brunei Darussalam, Jalan Tungku Link, Gadong, BE1410, Brunei Darussalam.*

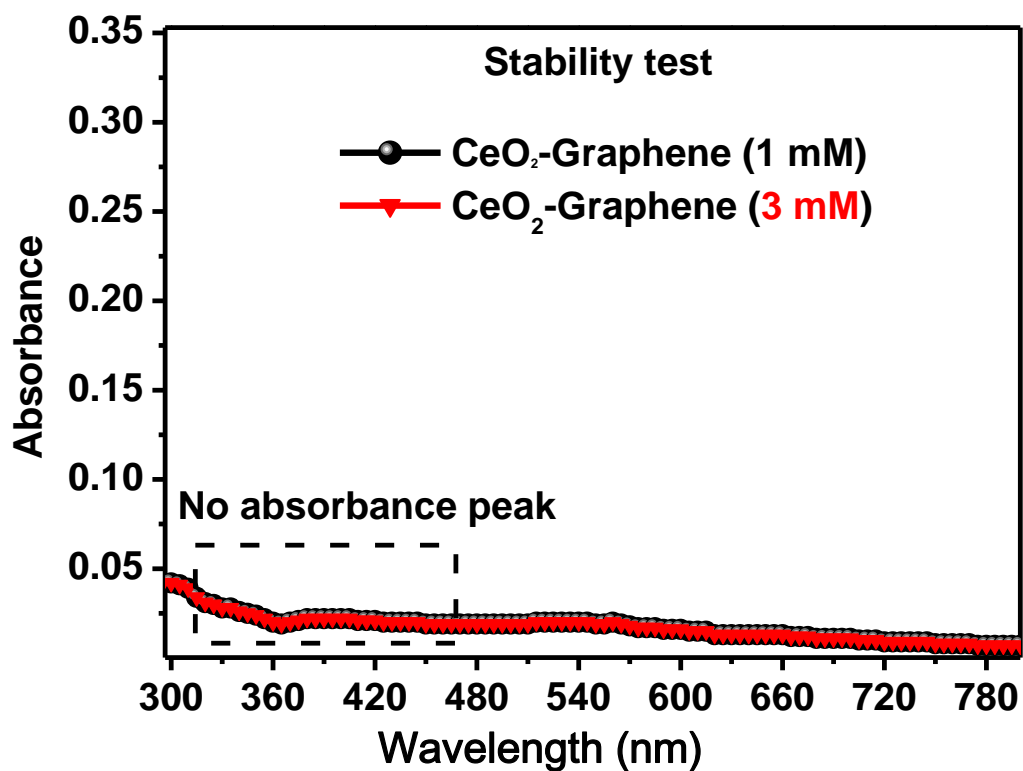

Fig. S1 Stability test of 1 mM and 3 mM CeO<sub>2</sub>-Graphene nanostructures.

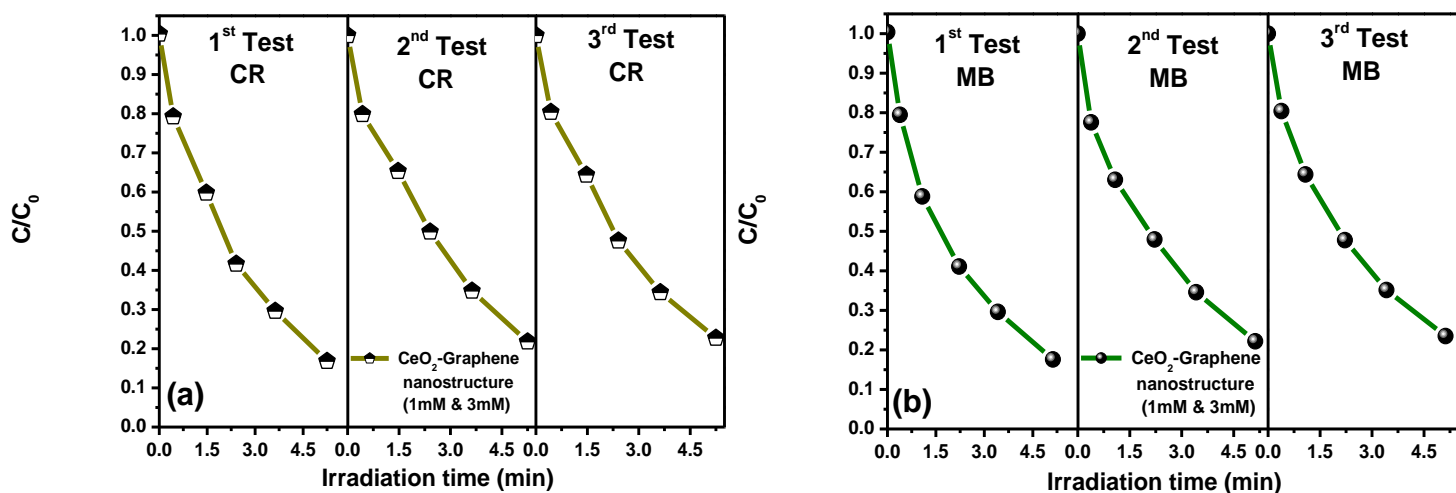

Fig. S2 (a and b) CR and MB reusability test spectra of 1 mM and 3 mM CeO<sub>2</sub>-Graphene nanostructures.

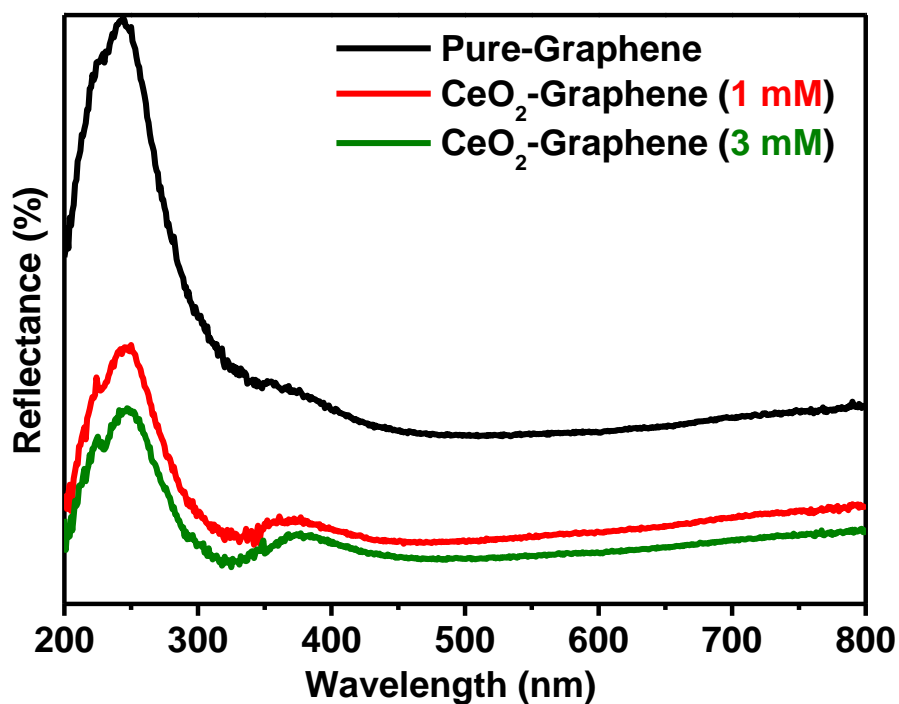

**Fig. S3** UV-Vis reflectance spectra of pure-graphene, 1 mM and 3 mM CeO<sub>2</sub>-Graphene nanostructures.

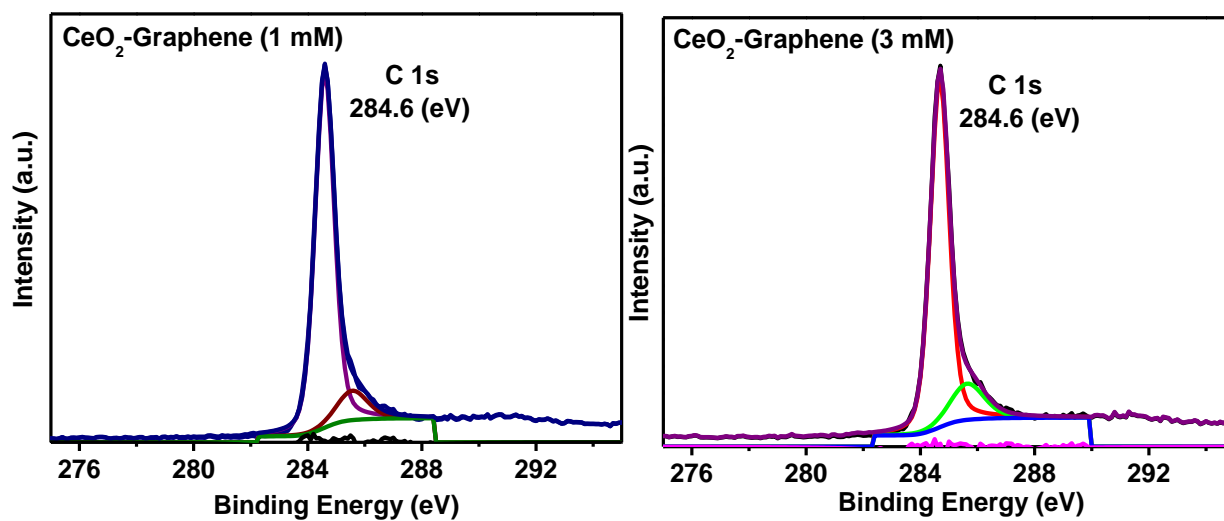

**Fig. S4 (a and b)** Fitted peak of C 1s corresponds to 1 mM and 3 mM CeO<sub>2</sub>-Graphene nanostructure.

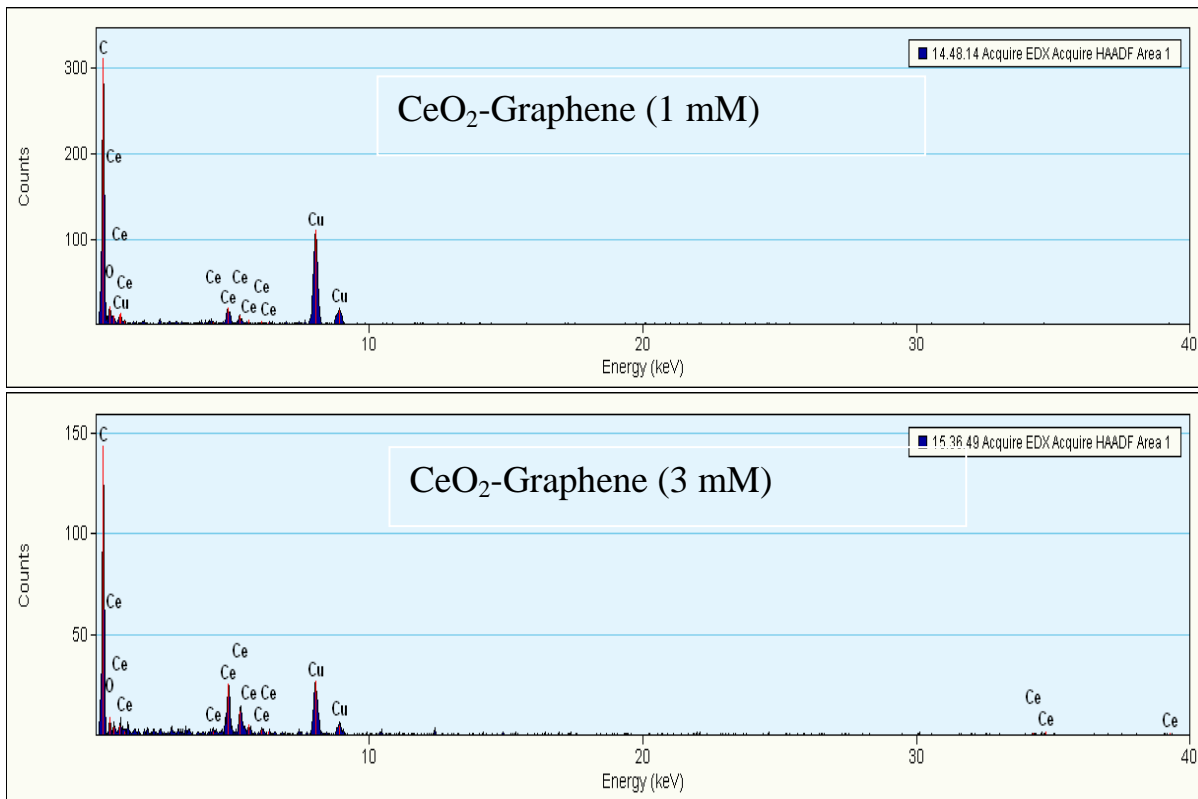

**Fig. S5 (a and b)** Elemental composition of 1 mM and 3 mM CeO<sub>2</sub>-Graphene nanostructure.

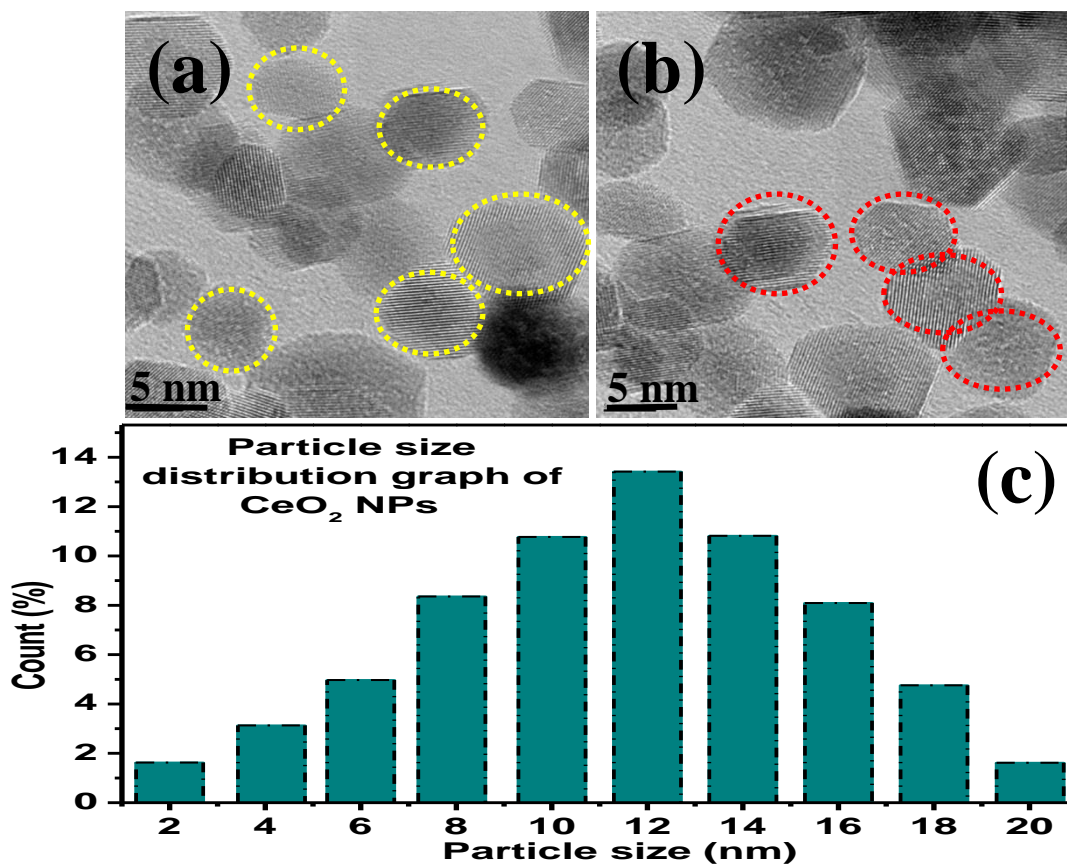

**Fig. S6 (a and b)** HR-TEM images of 1 mM and 3 mM CeO<sub>2</sub> NPs with high magnification values and visible lattice fringes **(c)** particle size distribution graph of CeO<sub>2</sub> NPs.
